# Supplementary material for: Observation of a nanoscale phase separation in blue-emitting Ce-doped SiO1.5 thin films
Source: Royal Society of Chemistry journal article supplement (doi:10.1039/c5tc02722e), 2015-01-01
Supplement: c5tc02722e1.pdf [file c5tc02722e1.pdf]

## Electronic Supplementary Information

# Observation of a nanoscale phase separation in blue-emitting Ce-doped SiO<sub>1.5</sub> thin films

*J. Weimmerskirch-Aubatin<sup>†</sup>, M. Stoffel<sup>†,\*</sup>, X. Devaux<sup>†</sup>, A. Bouché<sup>†</sup>, G. Beainy<sup>§</sup>, E. Talbot<sup>§</sup>,*

*P. Pareige<sup>§</sup>, Y. Fagot-Révurat<sup>†</sup>, M. Vergnat<sup>†</sup>, H. Rinnert<sup>†</sup>*

<sup>†</sup>Université de Lorraine, UMR CNRS 7198, Institut Jean Lamour, BP 70239,

54506 Vandœuvre-lès-Nancy, France

<sup>§</sup>Groupe de Physique des Matériaux, UMR CNRS 6634, Université et INSA de Rouen,

BP 12, Avenue de l'Université,

76801 Saint Etienne de Rouvray, France

\*Corresponding author: Mathieu Stoffel, e-mail : [mathieu.stoffel@univ-lorraine.fr](mailto:mathieu.stoffel@univ-lorraine.fr)

Figure S1 displays the room temperature steady state photoluminescence (PL) spectra of a 2% Ce-doped SiO<sub>1.5</sub> thin film measured prior to and after annealing at various temperatures between 500°C and 1100°C. All spectra are characterized by a rather broad band located between 330 and 550 nm. As already mentioned in the main text where only the evolution of the Ce-related PL intensity is discussed, the luminescence originates from the allowed electric dipolar *5d-4f* transition of isolated Ce<sup>3+</sup> ions. Interestingly, as the annealing temperature increases, the PL band shifts to higher wavelength. In the case of Ce, the *5d* orbitals are highly sensitive to the ligand field. The observed shift can thus be related to a modification of the local environment of Ce<sup>3+</sup> ions thereby supporting the structural evolution described in the main text.

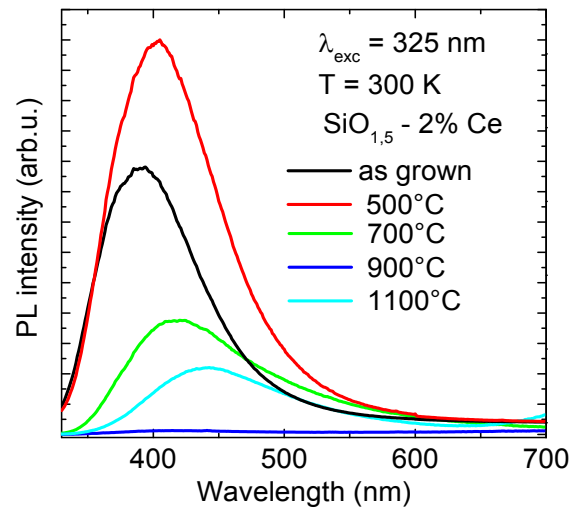

**Figure S1. Steady state PL spectra of a 2 % Ce-doped  $\text{SiO}_{1.5}$  thin film measured at room temperature prior to and after annealing at 500, 700, 900 and 1100°C.**
